1 **Balancing selection at a premature stop mutation in the *myostatin* gene underlies a**  
2 **recessive leg weakness syndrome in pigs**

3 Oswald Matika<sup>1</sup>, Diego Robledo<sup>1</sup>, Ricardo Pong-Wong<sup>1</sup>, Stephen C. Bishop<sup>1@</sup>, Valentina  
4 Riggio<sup>1</sup>, Heather Finlayson<sup>1</sup>, Natalie R. Lowe<sup>1</sup>, Annabelle E. Hoste<sup>2</sup>, Grant A. Walling<sup>2</sup>,  
5 Alan L. Archibald<sup>1</sup>, John A. Woolliams<sup>1‡</sup>, and Ross D. Houston<sup>1‡</sup>

6 <sup>1</sup>The Roslin Institute and Royal (Dick) School of Veterinary Studies, The University of Edinburgh,  
7 Midlothian, EH25 9RG, UK

8 <sup>2</sup>JSR Genetics, Southburn, Driffield, East Yorkshire, YO25 9ED, UK.

9 @Deceased

10 ‡ These authors contributed equally to this work

11 **ABSTRACT**

12 Balancing selection provides a plausible explanation for the maintenance of deleterious  
13 alleles at moderate frequency in livestock, including lethal recessives exhibiting  
14 heterozygous advantage in carriers. In the current study, a leg weakness syndrome  
15 causing mortality of piglets in a commercial line showed monogenic recessive  
16 inheritance, and a region on chromosome 15 associated with the syndrome was identified  
17 by homozygosity mapping. Whole genome resequencing of cases and controls identified  
18 a mutation coding for a premature stop codon within exon 3 of the porcine *Myostatin*  
19 (*MSTN*) gene, similar to those causing a double-muscling phenotype observed in several  
20 mammalian species. The *MSTN* mutation was in Hardy-Weinberg equilibrium in the  
21 population at birth, but significantly distorted amongst animals still in the herd at 110 kg,  
22 due to an absence of homozygous mutant genotypes. In heterozygous form, the *MSTN*  
23 mutation was associated with a major increase in muscle depth and decrease in fat depth,  
24 suggesting that the deleterious allele was maintained at moderate frequency due to

25 heterozygous advantage. Knockout of the porcine *MSTN* by gene editing has previously  
26 been linked to problems of low piglet survival and lameness. This *MSTN* mutation is an  
27 example of putative balancing selection in livestock, providing a plausible explanation  
28 for the lack of disrupting *MSTN* mutations in pigs despite many generations of selection  
29 for lean growth.

30 **Keywords: leg weakness, *MSTN*, balancing selection, heterozygous advantage, pigs**

### 31 **Introduction**

32 Leg weakness is heterogeneous condition causing lameness in pigs, and has negative  
33 impacts on both animal welfare and productivity [1, 2]. Significant heritability estimates  
34 have been reported for leg weakness traits [reviewed in 3], with moderate to high  
35 estimates in certain pig breeds, e.g.  $h^2 = 0.45$  in Landrace [4]. Several quantitative trait  
36 loci (QTL) have been identified for these traits, albeit they are generally not consistent  
37 across studies and breeds [5-8], which may be partly due to the heterogeneity of this  
38 condition. Interestingly, significant genetic correlations between leg weakness and other  
39 production traits (such as growth and muscle depth) have been detected [4]. Further, in a  
40 divergent selection experiment in Duroc lines, selection for high leg weakness was  
41 associated with a significant increase in muscle length and weight [9]. Taken together,  
42 these results suggest a degree of antagonistic genetic relationship between leg weakness  
43 and muscle growth traits in pigs, potentially explaining increases in the syndrome  
44 observed with intense selection for lean growth in recent decades.

45 Deleterious alleles can be maintained at relatively high frequency in commercial livestock  
46 populations due to heterozygous advantage for traits under selection [10]. Examples of  
47 such balancing selection in cattle include a frame-shift mutation in the *mannose receptor*  
48 *C typed 2 (MRC2)* gene responsible for crooked tail syndrome and also associated with

49 increased muscle mass in Belgian Blue [11], and a large deletion with antagonistic effects  
50 on fertility and milk production traits in Nordic Red [12, 13] is likely to have caused an  
51 increase in incidence of porcine stress syndrome (also known as malignant hyperthermia)  
52 in the 1970s and 1980s, due to the association of the causative missense mutation with  
53 reduced backfat – a trait under selection. More recently, a recessive embryonic lethal  
54 deletion in the *bone structure and strength QTL 9 (BSS9)* gene was associated with  
55 heterozygous advantage for growth rate, explaining an unexpectedly high frequency of  
56 this allele in a commercial pig line [14].

57 We investigated genetic parameters and mode of inheritance for a leg weakness syndrome  
58 causing piglet mortality in a commercial line of Large White pigs. A monogenic recessive  
59 inheritance was observed, and homozygosity mapping was used to identify a genomic  
60 region on *sus scrofa* chromosome (SSC) 15 associated with the trait. A mutation causing  
61 a premature stop codon in exon 3 of the *Myostatin (MSTN)* gene (similar to mutations  
62 causing the ‘double-muscling’ phenotype in cattle [15] was the outstanding functional  
63 candidate in the region. Comparison of *MSTN* genotype frequencies at birth and 110 kg  
64 supported this hypothesis, and carriers were shown to have significantly higher muscle  
65 mass and reduced fat depth than wild type homozygotes. Therefore, we propose that the  
66 *MSTN* mutant allele is highly deleterious in this population in homozygous form, but was  
67 maintained at moderate frequency due to heterozygous advantage.

## 68 **RESULTS**

### 69 **The piglet leg weakness trait shows a recessive mode of inheritance**

70 Estimates of heritability for the leg weakness syndrome (analysed as a binary trait on the  
71 underlying liability scale) was high ( $0.57 \pm 0.10$  in the sire and dam model) with low  
72 ( $0.17 \pm 0.02$  and  $0.11 \pm 0.02$ ) but significant effects observed for permanent

73 environmental effects due to the dam and litter, respectively (Table 2, Table S1). The  
74 overall prevalence of leg weakness in the commercial cohort was 6.3 % (Table 1). When  
75 only affected litters were considered, the mean proportion of affected piglets was 23 % ±  
76 0.7. This within-litter prevalence is consistent with the expectation under the hypothesis  
77 of a single recessive locus (i.e. 25 %). Complex Bayesian segregation analysis suggested  
78 that almost all the variation was explained by a single locus with almost no environmental  
79 variation. The estimate of the additive effect was  $0.50 \pm 0.001$  and dominance effect was  
80  $-0.50 \pm 0.001$ , which is in precise agreement with a recessive locus model.

### 81 **Causative variant maps to chromosome 15**

82 Homozygosity mapping was used to map the underlying recessive variant, and the longest  
83 homozygous segment was a region of ~ 8.3 Mbp on SSC 15. In this region, all 55  
84 informative single nucleotide polymorphisms (SNPs) on the Illumina PorcineSNP60 SNP  
85 chip [16] were homozygous in affected animals, but contained SNPs that were  
86 heterozygous or homozygous for the alternative allele in the unaffected animals. The  
87 segment started with SNP ALGA0110636 (rs81338938) at position 86,745,668 in the  
88 current Sscrofa11.1 reference genome assembly (Genbank assembly accession  
89 GCA\_000003025.6) and finished with SNP H3GA0044732 (rs80936849) at position  
90 95,062,143 (Fig 1a and b). The *MSTN* gene was located within this homozygous segment,  
91 from position 94,620,269 - 94,628,630. The 8.3 Mbp segment was assumed to represent  
92 a selective sweep likely to contain the underlying causative mutation, and became the  
93 focus of further analyses to discover and characterise this mutation.

### 94 **Sequence analysis reveals *MSTN* mutation as causative candidate**

95 To identify candidates for the causative variant, whole genome sequence data from ten  
96 cases, six presumed heterozygous carrier dams, and 22 controls were analysed. A total of

97 40 SNPs identified within the homozygous segment fitted the pattern of a potential  
98 causative variant assuming a recessive mode of inheritance. Functional annotation of  
99 these SNPs revealed that 19 were intergenic, 19 were intronic, 1 was in a pseudogene,  
100 and 1 caused a premature stop codon. There were also 10 InDels identified, 3 of which  
101 were intergenic and 7 of which were intronic (Figure S1). The outstanding functional  
102 candidate was a mutation in the third exon of the *MSTN* locus that results in the  
103 replacement of a codon for glutamic acid with a stop codon in exon 3 at position 274  
104 (c.820G>T; p.E274\*) (Figure 2A). The mutation is located in a region that is highly  
105 conserved across multiple species, and is predicted to result in truncation of the protein  
106 (Figure 2B). Functional annotation of all other variants detected in the selective sweep  
107 region did not reveal any other obvious causative candidates. This SNP and stop gain  
108 mutation was not present on the Ensembl variation database, accessed 25<sup>th</sup> July 2018.

### 109 **Changes in mutant allele frequency from piglets to adults**

110 The *MSTN* c.820G>T mutation showed no statistically significant deviation from Hardy  
111 Weinberg equilibrium (HWE) in the 486 piglets sampled at birth ( $q = 0.22$ ,  $\alpha = 0.019$ ,  
112  $\chi^2=0.18$ ,  $P > 0.05$ ). Random mating of the dioecious population would be expected to  
113 result in a value of  $\alpha$  that is slightly negative [17], and the value observed does not differ  
114 significantly from this value. However, the mutation deviated significantly from HWE at  
115 40 kg ( $q = 0.17$   $\alpha = - 0.180$ ,  $\chi^2=12.2$ ,  $P > 0.001$ ) and at 110 kg ( $q = 0.17$   $\alpha = - 0.210$ ,  
116  $\chi^2=11.45$ ,  $P > 0.001$ ). This was due to the loss of homozygous mutant piglets, with all but  
117 one dying (or being euthanized) shortly after birth, and the remaining piglet being  
118 euthanized due to poor health before it reached 110 kg. The large change in  $\alpha$  in a negative  
119 direction is quantitative evidence of the selective disappearance of homozygote  
120 genotypes, as opposed to disappearance as a result of selection against the allele itself.  
121 There were no significant changes in the relative genotype frequencies (GG, GT) over the

122 total period or any sub-period from birth to the end of the test, confirming all changes in  
123  $q$  and  $a$  are due to the selective loss of homozygotes, and that any other mortality or  
124 culling was at random with respect to *MSTN* genotype.

### 125 **Association of the *MSTN* mutation with performance traits**

126 The association of the porcine *MSTN* c.820G>T mutation with performance traits was  
127 assessed on 384 pigs which had completed a commercial performance test. Given the loss  
128 of the homozygous mutant animals the effect of the *MSTN* c.820G>T mutation was only  
129 estimated by the difference between the heterozygotes and the wild type pigs. The  
130 genotype means and differences are shown in Table 3, with the most notable of these  
131 being a major increase in muscle depth and a reduction in fat depth in the carriers ( $p <$   
132 0.001), with no evidence of a difference in live weight at 110 kg. Approximately 31 % of  
133 the genetic variation in muscle depth and 18 % of the genetic variation in fat depth was  
134 explained by this single variant (Table 3). The heterozygous animals had on average  
135 5 mm increased muscle depth, and 1.7 mm decreased backfat depth when compared with  
136 wild type homozygous animals.

### 137 **DISCUSSION**

138 A piglet leg weakness syndrome identified in a commercial line of Large White pigs  
139 showed moderate to high heritability, consistent with the upper range of estimates  
140 reported in the literature [18, 19, 2]. The within-litter incidence of the syndrome and the  
141 complex Bayesian segregation analysis both pointed to a monogenic recessive condition.  
142 Homozygosity mapping revealed a 8.3 Mbp segment on SSC15 as a putative selective  
143 sweep likely to contain the causative variant. The outstanding functional candidate variant  
144 identified by whole genome sequencing of cases and controls caused a premature stop  
145 codon within exon 3 of the *MSTN* gene (Figure 2), and this variant was in HWE at birth

146 but significantly distorted by 110 kg due to an absence of homozygous mutant animals.  
147 Knockout of *MSTN* by gene editing in previous studies has been associated with poor  
148 health and mortality of knockout piglets [20-23], including observations of a piglet leg  
149 weakness syndrome with an inability to stand or walk [21], strikingly similar to the  
150 syndrome described in the current study.

151 *MSTN* is a member of the *transforming growth factor beta* (*TGF-β*) superfamily, which  
152 is highly conserved across species, and is typically expressed in developing and mature  
153 skeletal muscle as a key regulator of muscle growth [24]. The *MSTN* gene has been a  
154 gene of interest to animal breeders for over twenty years since the discovery of loss-of-  
155 function mutations in the cattle *MSTN* gene, which cause muscle hypertrophy leading to  
156 double muscling phenotypes [15, 24, 25]. Interestingly, these loss-of-function mutations  
157 causing double muscling are frequently due to premature stop mutations in the highly  
158 conserved exon 3 of *MSTN* [25], (Figure 3). Further, in the case of Marchigiana beef  
159 cattle, the *MSTN* variant causing double muscling results is due to replacement of  
160 Glutamic Acid with a stop codon (the same change observed in the current study) in the  
161 equivalent position in the protein as observed in the current study [26]. This observation  
162 provides additional indirect evidence that the porcine *MSTN* mutation described herein is  
163 likely to cause the increase in muscle depth and decrease in fat depth associated with  
164 carrier animals.

165 In livestock breeding schemes, *MSTN*-inactivating mutations have been retained due to  
166 selection for increased lean growth associated with meat production, particularly for  
167 double-muscled cattle. However, despite many generations of selection for lean growth  
168 in pigs no such mutations have been reported previously. Associations between  
169 polymorphisms within the porcine *MSTN* gene and production traits have been shown in  
170 small-scale studies [27-29]. Further, a genome-wide association study in a sire line Large

171 White population (related to the animals in the current study) detected SNPs on SSC 15  
172 significantly associated with rib fat between 81.1 and 87.8 Mbp [30]. While these SNPs  
173 are between 7 and 13 Mbp closer to the centromere than *MSTN*, two of these SNPs  
174 overlap with the region on homozygosity indicative of a selective sweep in the current  
175 study. Therefore, it is plausible that this association may be due to linkage disequilibrium  
176 (LD) with the *MSTN* variant, or that other variants impacting performance traits exist on  
177 SSC15. The selection index applied in this line explicitly benefited animals with positive  
178 muscle depth and negative fat depth estimated breeding values, with analysis of the index  
179 showing that heterozygotes had a slight but significant advantage ( $p < 0.05$ ). Therefore, it  
180 is likely that the *MSTN* c.820G>T mutation was maintained at moderate frequency in this  
181 line despite its deleterious impact on piglet mortality due to heterozygous advantage for  
182 muscle and fat traits. Similar examples of balancing selection have observed to explain  
183 the maintenance of deleterious alleles at moderate frequency in commercial cattle [10,  
184 31] and pig [14] populations. The results described herein have major implications for the  
185 targeted ablation of *MSTN* via gene editing to increase lean growth in pigs, and provide a  
186 plausible explanation of why *MSTN* loss-of-function mutations have not previously been  
187 reported in pigs despite decades of selection for lean growth.

## 188 **Materials and Methods**

### 189 **Ethics statement**

190 All samples were collected on a commercial nucleus farm as part of standard husbandry  
191 and management procedures in the nucleus herd, which complied with conventional UK  
192 red tractor farm assurance standards (<https://assurance.redtractor.org.uk/>) where sick or  
193 injured livestock that do not respond to treatment are promptly and humanely euthanized  
194 by a trained and competent stockperson.



195 **Animals**

196 A piglet leg weakness syndrome was characterised in a Large White sire line, reared in a  
197 nucleus herd, under standard conditions but with additional data recording. Leg weakness  
198 trait observations were collected on 19,006 piglets from 2007 to 2010, during which time  
199 a high incidence of the syndrome was detected. In addition, DNA was sampled on a  
200 further 119 piglets in 2011 and 486 piglets from the same population in 2012, of these  
201 384 also had weight and carcass phenotypes available. The cohort born in 2007 to 2010  
202 will be referred to as the commercial cohort and those in 2011 and 2012 as the survey  
203 cohort. Pedigree was available for all animals and spanned 9 generations. Details of the  
204 data and pedigree structure are presented in Table 1.

205 The leg weakness in the phenotyped animals was visually classified as normal or affected  
206 (0 / 1 respectively). The leg defect is characterised by the piglet not being able to  
207 straighten its legs to stand, this being most apparent for the front legs, and being slow to  
208 suckle. Videos exemplifying the syndrome are given in Additional File 1. Detailed post  
209 mortems were conducted on two affected individuals but the results were ineffective in  
210 providing additional diagnostic aids (see Additional File 2). The Online Mendelian  
211 Inheritance in Animals database (OMIA: <http://omia.org/OMIA000585/9823/>) was  
212 searched for previous reports of leg weakness in pigs but the syndrome observed here did  
213 not appear. These problems frequently resulted in death from either starvation or being  
214 crushed by the sow. Where the outcome resulted in poor welfare the piglets were  
215 euthanised in accord with the Ethics Statement. Additional farrowing data were collected  
216 on the females in the commercial cohort including numbers born alive, dead or  
217 mummified, parity and year of birth. Body weights, ultrasound muscle and fat depths  
218 were obtained for individuals in the survey cohort that were retained in the herd until  
219 commercial slaughter age (when average weight is 110kg). The ultrasonic measurements

220 taken were the average depth of the *m. longissimus dorsi* and overlaying subcutaneous fat  
221 layer across the last four ribs.

## 222 **Statistical analyses of genetic parameters**

223 Initial studies to establish the genetic basis of the leg weakness syndrome were undertaken  
224 by fitting linear mixed models to the commercial cohort. The binary record of the  
225 syndrome was modelled on the observed 0 / 1 scale and the full model fitted was:

$$226 \mathbf{y} = \mathbf{X}\boldsymbol{\beta} + \mathbf{Z}_1\mathbf{u} + \mathbf{Z}_2\mathbf{v} + \mathbf{Z}_3\mathbf{w} + \mathbf{e} \quad (1)$$

227 where  $\mathbf{y}$  is the vector of leg weakness phenotypes;  $\boldsymbol{\beta}$ , a vector of fixed effects for month  
228 of observation (43 df), sex (1 df), parity (7 df), numbers in litter born dead (1 df) or alive  
229 (1 df), with design matrix  $\mathbf{X}$ ;  $\mathbf{u}$ , additive polygenic effects, assumed to be distributed  
230  $MVN(0, \mathbf{A}\sigma_a^2)$  with design matrix  $\mathbf{Z}_1$ ;  $\mathbf{v}$ , random litter effects assumed to be distributed  
231  $MVN(0, \mathbf{I}\sigma_v^2)$ , with design matrix  $\mathbf{Z}_2$ ;  $\mathbf{w}$ , maternal environment effects across litters  
232 assumed to be distributed  $MVN(0, \mathbf{I}\sigma_w^2)$  with design matrix  $\mathbf{Z}_3$ ; and  $\mathbf{e}$  residuals assumed  
233 to be distributed  $MVN(0, \mathbf{I}\sigma_e^2)$ . Variations in this model were fitted replacing the  
234 individual polygenic effects with sire and/or dam effects, assumed to be distributed  
235  $MVN(0, \mathbf{A}\sigma_s^2)$  and  $MVN(0, \mathbf{A}\sigma_d^2)$  respectively. All models were fitted using the  
236 ASREML software [32]. Likelihood ratio tests were used to assess the random effects.  
237 In addition, an analogous threshold mode with an underlying continuous liability was  
238 fitted with a logit link function and sire and dam effects associated with the pedigree, but  
239 not with individual polygenic effects, following recommendation of Gilmour et al. [36].  
240 For the full model, the phenotypic variance was calculated as  $\sigma_p^2 = \sigma_u^2 + \sigma_v^2 + \sigma_w^2 + \sigma_e^2$ .  
241 Where sire and dam models were used,  $\sigma_u^2$  was replaced by  $\sigma_s^2 + \sigma_d^2$ . Heritability ( $h^2$ )  
242 was calculated as  $\sigma_u^2/\sigma_p^2$  or  $2(\sigma_s^2 + \sigma_d^2)/\sigma_p^2$  depending on the model. The proportion of

243 variance explained by the litter and maternal environmental effects were estimated as  
244  $\sigma_v^2/\sigma_p^2$  and  $\sigma_w^2/\sigma_p^2$ , respectively. Heritabilities on the observed scale (0/1) was  
245 transformed to an underlying liability scale following Dempster and Lerner [33] using the  
246 observed prevalence of the syndrome in the commercial population which was 6.3%

247 Inspection of the data suggested that the syndrome may be due to a single gene with the  
248 predisposing deleterious allele showing a recessive mode of inheritance, and this  
249 hypothesis was tested using chi square tests and segregation analyses. An initial test of a  
250 monogenic recessive mode of inheritance was carried out by pooling all affected litters,  
251 estimating the probability of being affected conditional on being born in an affected litter,  
252 and using chi-squared to test the null hypothesis that the probability of being affected was  
253 0.25. A weakness of this approach is that some litters by chance will have no affected  
254 offspring, so a more complex segregation model was fitted. This model included all  
255 known phenotypes and pedigree data, and assumed a monogenic inheritance with  
256 environmental variation fitted by Gibbs sampling [34].

### 257 **Homozygosity mapping of the recessive mutation**

258 Ten affected animals from different litters and 10 unaffected full-sib controls from the  
259 commercial cohort were genotyped using the Illumina PorcineSNP60 SNP chip [16].  
260 Only those SNPs that mapped to known positions on autosomal chromosomes and were  
261 not fixed nor completely heterozygous were retained. This left 38,570 segregating  
262 autosomal SNPs for the use in homozygosity mapping. Homozygous regions were  
263 assessed by alignment with the Sscrofa11.1 reference genome assembly sequence  
264 (Genbank assembly accession GCA\_000003025.6).

### 265 **Whole genome resequencing**

266 The genomes of the ten cases used for homozygosity mapping and six separate dams with  
267 affected offspring, assumed heterozygotes, were whole genome shotgun sequenced on an  
268 Illumina HiSeq 2500 platform. The dams were individually sequenced with a 10x genome  
269 coverage. The piglets were barcoded and individually sequenced at 3x coverage to  
270 achieve 30x coverage for the pool. The full sequencing output resulted in ~1.3 billion  
271 paired-end reads with an average of 48 million paired-end reads/sample for the piglets  
272 and 157 million paired-end reads/sample for the dams. Quality filtering and removal of  
273 residual adaptor sequences was conducted on read pairs using Trimmomatic v.0.32 [35].  
274 Only reads where both pairs had a length greater than 32 bp post-filtering were retained,  
275 leaving a total of ~1.2 bn paired-end reads.

276 Whole genome resequencing was followed by alignment to the Sscrofa11.1 assembly;  
277 using the Burrows-Wheeler Aligner with default parameters [36]. The average alignment  
278 rate of properly paired reads was of 92 %. PCR duplicates were marked using Picard  
279 Tools (<http://broadinstitute.github.io/picard>). Variant calling was performed using the  
280 Genome Analysis Toolkit (GATK) HaplotypeCaller after read recalibration [37]. The  
281 parameter setting for the hard filters that were applied to the raw genotypes were:  
282 QualByDepth < 2.0, FisherStrand > 60.0, RMSMappingQuality < 40.0,  
283 MappingQualitySumTest < -12.5, ReadPosRankSumTest < -8.0.

284 Candidate loci were identified from the sequences of the 16 animals from this study plus  
285 22 additional *Sus scrofa* control sequences obtained from a public database [38],  
286 comprising 7 domesticated breeds (Duroc, Hampshire, Jiangquhai, Landrace, Large  
287 White, Meishan and Pietrain) and wild boar. The following criteria were used to identify  
288 candidate SNPs:

289 i. Homozygous for the same allele in all the affected piglets

- 290 ii. Heterozygous in parents of affected piglets (i.e. putative carriers)  
291 iii. Heterozygous or homozygous for the alternative allele (i.e. the one not observed  
292 in the affected offspring) in the control (unaffected) animals

293 It is worth noting that the limited sequencing depth means that both alleles will not be  
294 detected for all bases in all individuals. This limitation is particularly relevant to the  
295 reliable detection of heterozygous SNPs.

296

### 297 **Genotyping**

298 A 'kompetitive allele specific PCR' (KASP) assay was designed by LGC Genomics  
299 (Teddington, UK) to enable genotyping of the mutation in the *MSTN* stop codon in large  
300 numbers of animals. The survey cohort of 486 piglets sampled at birth were genotyped  
301 by LGC. Of these, 265 remained as candidates for the final selection at 110 kg with a  
302 complete record of their performance test, together with another 119 pigs phenotyped at  
303 slaughter age (total n = 374). In both the 486 piglets and the subsequent subsets surviving  
304 to 40 and 110 kg, the frequency of the *MSTN* mutation (q) was calculated by counting,  
305 and the departure from Hardy Weinberg equilibrium the genotypes was estimated as  $\alpha$   
306  $=1-H_{\text{obs}}/H_{\text{exp}}$  [17] where  $H_{\text{obs}}$  is the observed heterozygosity and  $H_{\text{exp}}$  is the expected  
307 heterozygosity calculated as  $2q(1-q)$ . The significance of departure from true random  
308 mating genotype frequencies ( $\alpha = 0$ ) was tested using a chi-squared test.

### 309 **Association analysis**

310 Associations between the *MSTN* c.820G>T locus and variation in performance traits in  
311 commercial testing conditions were examined in the survey cohort (n = 384). The  
312 performance test was started at a target weights of 40 kg, at an average age of 85 days,

313 and continued for 54 (s.d. 12) days. The performance tests were performed over two  
314 distinct periods. The traits available were live weights and ages at the start and the end of  
315 the test, ultrasonic muscle and fat depths measured at the end of the test, days from birth  
316 to 40 kg and days from 40 to 110 kg. Univariate mixed models were fitted to these data  
317 in ASReml-R4 using the following model:

$$318 \quad \mathbf{y} = \mathbf{1}\mu + \mathbf{X}_1\boldsymbol{\beta} + \mathbf{X}_2b + \mathbf{Z}\mathbf{u} + \mathbf{e} \quad (2)$$

319 where  $\mathbf{y}$  is the vector of phenotypes;  $\mu$ , a fitted mean, and  $\mathbf{1}$ , a vector of 1's;  $\boldsymbol{\beta}$ , a vector  
320 of fixed nuisance effects with design matrix  $\mathbf{X}_1$ ;  $b$ , a scalar fixed effect for the effect of  
321 SNP genotype with design matrix  $\mathbf{X}_2$ , this has only 1 df due to the absence of homozygotes  
322 completing the test;  $\mathbf{u}$ , additive polygenic effects assumed to be distributed  $MVN(0,$   
323  $\mathbf{A}\sigma_a^2)$ , with design matrix  $\mathbf{Z}$ ; and  $\mathbf{e}$ , residuals assumed to be distributed  $MVN(0, \mathbf{I}\sigma_e^2)$ .  
324 For all traits, the sex of the piglet (1 df), parity of dam (4 df) and period of testing (1 df)  
325 were fitted as nuisance factors, together with cubic smoothing splines for the start date of  
326 the test fitted separately within each period [39]. The age at the time of measurement was  
327 fitted as covariate (1 df) for all traits other than days to 40 kg and days from 40 to 110 kg.  
328 The significance of fixed effects was assessed using Wald tests [ASReml Manual].

### 329 ACKNOWLEDGEMENTS

330 Institute Strategic Funding Grants to The Roslin Institute (BBS/E/D/20211553  
331 BBS/E/D/30002275). Edinburgh Genomics is partly supported through core grants from  
332 NERC (R8/H10/56), MRC (MR/K001744/1) and BBSRC (BB/J004243/1). Diego  
333 Robledo is supported by a Newton International Fellowship of the Royal Society  
334 (NF160037)

### 335 REFERENCES:

- 336 1. Hill MA. Economic relevance, diagnosis, and countermeasures for degenerative joint disease  
337 (osteoarthritis) and dyschondroplasia (osteocondrosis) in pigs. *Journal of the American*  
338 *Veterinary Medical Association*. 1990;197(2):254-9.
- 339 2. Rothschild MF, Christian LL. Genetic-control of front-leg weakness in duroc swine .1. Direct  
340 response to 5 generations of divergent selection. *Livestock Production Science*. 1988;19(3-  
341 4):459-71.
- 342 3. Fukawa K, Kusuhara S. The genetic and non-genetic aspects of leg weakness and  
343 osteochondrosis in pigs - Review. *Asian Australas J Anim Sci*. 2001;14(1):114-22.
- 344 4. Jorgensen B, Vestergaard T. Genetics of leg weakness in boars at the Danish pig breeding  
345 stations. *Acta Agriculturae Scandinavica*. 1990;40(1):59-69.
- 346 5. Guo YM, Ai HS, Ren J, Wang GJ, Wen Y, Mao HR et al. A whole genome scan for quantitative  
347 trait loci for leg weakness and its related traits in a large F-2 intercross population between  
348 White Duroc and Erhualian. *J Anim Sci*. 2009;87(5):1569-75.
- 349 6. Uemoto Y, Sato S, Ohnishi C, Hirose K, Kameyama K, Fukawa K et al. Quantitative trait loci for  
350 leg weakness traits in a Landrace purebred population. *Anim Sci J*. 2010;81(1):28-33.
- 351 7. Laenoi W, Uddin MJ, Cinar MU, Phatsara C, Tesfaye D, Scholz AM et al. Molecular  
352 characterization and methylation study of matrix gla protein in articular cartilage from pig with  
353 osteochondrosis. *Gene*. 2010;459(1-2):24-31.
- 354 8. Laenoi W, Uddin MJ, Cinar MU, Grosse-Brinkhaus C, Tesfaye D, Jonas E et al. Quantitative trait  
355 loci analysis for leg weakness-related traits in a Duroc x Pietrain crossbred population. *Genet Sel*  
356 *Evol*. 2011;43:7.
- 357 9. Draper DD, Rothschild MF, Christian LL. Effects of divergent selection for leg weakness on  
358 muscle and bone characteristics in Duroc swine. *Genet Sel Evol*. 1992;24(4):363-74.
- 359 10. Hedrick PW. Heterozygote Advantage:The Effect of Artificial Selection in Livestock and Pets.  
360 *J Hered*. 2015;106(2):141-54.
- 361 11. Fasquelle C, Sartelet A, Li WB, Dive M, Tamma N, Michaux C et al. Balancing Selection of a  
362 Frame-Shift Mutation in the MRC2 Gene Accounts for the Outbreak of the Crooked Tail  
363 Syndrome in Belgian Blue Cattle. *PLoS Genet*. 2009;5(9):9.
- 364 12. Otsu K, Khanna VK, Archibald AL, Maclennan DH. Cosegregation of porcine malignant  
365 hyperthermia and a probable causal mutation in the skeletal-muscle ryanodine receptor gene in  
366 backcross families. *Genomics*. 1991;11(3):744-50.
- 367 13. Fujii J, Otsu K, Zorzato F, Deleon S, Khanna VK, Weiler JE et al. Identification of a mutation in  
368 porcine ryanodine receptor associated with malignant hyperthermia. *Science*.  
369 1991;253(5018):448-51.
- 370 14. Derks MFL, Lopes MS, Bosse M, Madsen O, Dibbits B, Harlizius B et al. Balancing selection  
371 on a recessive lethal deletion with pleiotropic effects on two neighboring genes in the porcine  
372 genome. *PLoS Genet*. 2018.
- 373 15. Grobet L, Martin LJR, Poncelet D, Pirottin D, Brouwers B, Riquet J et al. A deletion in the  
374 bovine myostatin gene causes the double-muscling phenotype in cattle. *Nature Genetics*.  
375 1997;17(1):71-4.
- 376 16. Ramos AM, Crooijmans R, Affara NA, Amaral AJ, Archibald AL, Beever JE et al. Design of a  
377 High Density SNP Genotyping Assay in the Pig Using SNPs Identified and Characterized by Next  
378 Generation Sequencing Technology. *PLoS One*. 2009;4(8):13.
- 379 17. Robertson A. Inbreeding in artificial selection programmes. *Genetical Research*.  
380 1961;2(02):189-94.
- 381 18. Bereskin B. Genetic-aspects of feet and legs soundness in swine. *J Anim Sci*. 1979;48(6):1322-  
382 8.
- 383 19. Jorgensen B, Andersen S. Genetic parameters for osteochondrosis in Danish Landrace and  
384 Yorkshire boars and correlations with leg weakness and production traits. *Anim Sci*.  
385 2000;71:427-34.
- 386 20. Kang JD, Kim S, Zhu HY, Jin L, Guo Q, Li XC et al. Generation of cloned adult muscular pigs  
387 with myostatin gene mutation by genetic engineering. *RSC Adv*. 2017;7(21):12541-9.

- 388 21. Kang Q, Hu Y, Zou Y, HU W, Li L, Chang F et al., editors. Improving pig genetic resistance and  
389 muscle production through molecular biology. Proceedings, 10th World Congress of Genetics  
390 Applied to Livestock Production; 2014 August 17-22; Vancouver, BC, Canada.
- 391 22. Wang KK, Ouyang HS, Xie ZC, Yao CG, Guo NN, Li MJ et al. Efficient Generation of Myostatin  
392 Mutations in Pigs Using the CRISPR/Cas9 System. *Sci Rep.* 2015;5.
- 393 23. Cyranoski D. Super-muscly pigs created by small genetic tweak. *Nature.* 2015;523(7558):13-  
394 4.
- 395 24. McPherron AC, Lee SJ. Double muscling in cattle due to mutations in the myostatin gene.  
396 Proceedings of the National Academy of Sciences of the United States of America.  
397 1997;94(23):12457-61.
- 398 25. Bellinge RHS, Liberles DA, Iaschi SPA, O'Brien PA, Tay GK. Myostatin and its implications on  
399 animal breeding: a review. *Animal Genetics.* 2005;36(1):1-6.
- 400 26. Marchitelli C, Savarese MC, Crisa A, Nardone A, Marsan PA, Valentini A. Double muscling in  
401 Marchigiana beef breed is caused by a stop codon in the third exon of myostatin gene. *Mamm*  
402 *Genome.* 2003;14(6):392-5.
- 403 27. Stinckens A, Luyten T, Bijttebier J, Van den Maagdenberg K, Dieltiens D, Janssens S et al.  
404 Characterization of the complete porcine MSTN gene and expression levels in pig breeds  
405 differing in muscularity. *Animal Genetics.* 2008;39(6):586-96.
- 406 28. Tu PA, Shiao JW, Ding ST, Lin EC, Wu MC, Wang PH. The association of genetic variations in  
407 the promoter region of myostatin gene with growth traits in Duroc pigs. *Animal Biotechnology.*  
408 2012;23(4):291-8.
- 409 29. Tu PA, Lo LL, Chen YC, Hsu CC, Shiao JW, Lin EC et al. Polymorphisms in the promoter region  
410 of myostatin gene are associated with carcass traits in pigs. *J Anim Breed Genet.*  
411 2014;131(2):116-22.
- 412 30. Fowler KE, Pong-Wong R, Bauer J, Clemente EJ, Reitter CP, Affara NA et al. Genome wide  
413 analysis reveals single nucleotide polymorphisms associated with fatness and putative novel  
414 copy number variants in three pig breeds. *BMC Genomics.* 2013;14:15.
- 415 31. Kadri NK, Sahana G, Charlier C, Iso-Touru T, Gulbrandtsen B, Karim L et al. A 660-Kb Deletion  
416 with Antagonistic Effects on Fertility and Milk Production Segregates at High Frequency in Nordic  
417 Red Cattle: Additional Evidence for the Common Occurrence of Balancing Selection in Livestock.  
418 *PLoS Genet.* 2014;10(1):11.
- 419 32. Gilmour AR, Gogel BJ, Cullis BR, Thompson R. ASReml User Guide Release 3.0. 3.0 ed.  
420 Hempstead, HP1 1ES, UK.: VSN Int. Ltd Hempstead; 2009.
- 421 33. Dempster ER, Lerner IM. Heritability of threshold characters. *Genetics.* 1950;35:212-36.
- 422 34. Walling GA, Bishop SC, Pong-Wong R, Gittus G, Russel AJF, Rhind SM. Detection of a major  
423 gene for litter size in Thoka Cheviot sheep using Bayesian segregation analyses. *Anim Sci J.*  
424 2002;75:339-47.
- 425 35. Bolger AM, Lohse M, Usadel B. Trimmomatic: a flexible trimmer for Illumina sequence data.  
426 *Bioinformatics.* 2014;30(15):2114-20.
- 427 36. Li H, Durbin R. Fast and accurate long-read alignment with Burrows-Wheeler transform.  
428 *Bioinformatics.* 2010;26(5):589-95.
- 429 37. DePristo MA, Banks E, Poplin R, Garimella KV, Maguire JR, Hartl C et al. A framework for  
430 variation discovery and genotyping using next-generation DNA sequencing data. *Nature*  
431 *Genetics.* 2011;43(5):491-+.
- 432 38. Groenen MAM, Archibald AL, Uenishi H, Tuggle CK, Takeuchi Y, Rothschild MF et al. Analyses  
433 of pig genomes provide insight into porcine demography and evolution. *Nature.*  
434 2012;491(7424):393-8.
- 435 39. White IMS, Thompson R, Brotherstone S. Genetic and environmental smoothing of lactation  
436 curves with cubic splines. *J Dairy Sci.* 1999;82(3):632-8.

437



439 Table 1 Number of animals in pedigree and records used for variance components  
440 analyses

| Description                | Data   |
|----------------------------|--------|
| Number of records          | 19,006 |
| Number of pedigree records | 27,501 |
| Number of generations      | 9      |
| Number of litter           | 1,903  |
| Number of Sires            | 346    |
| Number of Sires of Sire    | 175    |
| Number of Dams of Sire     | 239    |
| Number of Dams             | 1,929  |
| Number of Sires of Dam     | 240    |
| Number of Dams of Dam      | 882    |
| Prevalence %               | 6.3    |

441

442 Table 2 Genetic parameter estimates and standard errors for the trait of leg weakness on  
 443 the liability scale using the logit transformation showing the outcomes of fitting sire or  
 444 dam models with or without maternal environment ( $\sigma^2_w$ ). All models have litter variance  
 445 ( $\sigma^2_v$ ) fitted

| Model <sup>¥</sup>      | Sire             |  | Sire and Dam Models |                  |
|-------------------------|------------------|--|---------------------|------------------|
|                         | $\sigma^2_w > 0$ |  | $\sigma^2_w > 0$    | $\sigma^2_w = 0$ |
| $\sigma^2_s$            | 1.069 (0.283)    |  | 1.100 (0.290)       | 1.087 (0.286)    |
| $\sigma^2_d$            |                  |  | 0.664 (0.231)       | 1.110 (0.186)    |
| $\sigma^2_v$            | 0.681 (0.123)    |  | 0.681 (0.123)       | 0.769 (0.123)    |
| $\sigma^2_w$            | 0.999 (0.148)    |  | 0.437 (0.203)       |                  |
| $\sigma^2_p$            | 6.049 (0.307)    |  | 6.182 (0.322)       | 6.267 (0.325)    |
| $h^2_u$                 | 0.71 (0.16)      |  | 0.57 (0.10)         | 0.70 (0.08)      |
| $\sigma^2_v/\sigma^2_p$ | 0.11 (0.02)      |  | 0.11 (0.02)         | 0.12 (0.02)      |
| $\sigma^2_w/\sigma^2_p$ | 0.17 (0.2)       |  | 0.07 (0.03)         |                  |

446 <sup>¥</sup> -  $\sigma^2_s$ ,  $\sigma^2_d$ ,  $\sigma^2_v$  and  $\sigma^2_w$  are variances due to the sire and dam genetic effects, litter and  
 447 maternal environment effects.  $\sigma^2_p$  is phenotypic variance.  $h^2_u$  is estimated heritability on  
 448 observed scale, and  $\sigma^2_v/\sigma^2_p$  and  $\sigma^2_w/\sigma^2_p$  are the proportion of phenotypic variance  
 449 explained by the litter and maternal environment effects respectively

450

451

452

453

454 Table 3. Estimates and statistical significance of the effect of the *MSTN* c.820G>T locus  
 455 on the growth and carcass traits of pigs obtained from a commercial performance test.  
 456 Estimates are shown in absolute units and standardised by phenotypic standard  
 457 deviations ( $\sigma_p$ ). Standard errors are in parentheses. The traits are categorised into: live  
 458 weights and live weight gain; muscle and fat depths measured by ultrasound at the end  
 459 of the test either conditional on age or on live weight; and periods to achieve growth  
 460 targets.

| Trait                     | <i>MSTN</i> c.820G>T genotypes |              |              | $\sigma_p$  | TG-GG<br>$\sigma_p$ units | Wald<br>test |
|---------------------------|--------------------------------|--------------|--------------|-------------|---------------------------|--------------|
|                           | TG                             | GG           | TG-GG        |             |                           |              |
| <i>Live weights:</i>      |                                |              |              |             |                           |              |
| At start (kg)             | 36.83 (0.84)                   | 38.18 (0.85) | -1.36 (0.44) | 3.81 (0.18) | -0.36                     | P<0.01       |
| At end (kg)               | 84.89 (1.59)                   | 87.13 (1.64) | -2.24 (0.94) | 7.96 (0.33) | -0.28                     | P<0.05       |
| Daily gain (kg/d)         | 1.02 (0.02)                    | 1.03 (0.02)  | -0.01 (0.01) | 0.11 (0.01) | -0.09                     | NS           |
| <i>Depths for age:</i>    |                                |              |              |             |                           |              |
| Fat depth (mm)            | 8.42 (0.62)                    | 10.19 (0.62) | -1.76 (0.31) | 2.72 (0.13) | -0.65                     | P<0.001      |
| Muscle depth (mm)         | 53.21 (1.11)                   | 48.38 (1.10) | 4.83 (0.68)  | 5.95 (0.25) | 0.81                      | P<0.001      |
| <i>Depths for weight:</i> |                                |              |              |             |                           |              |
| Fat depth (mm)            | 9.25 (0.57)                    | 10.74(0.56)  | -1.49 (0.28) | 2.49 (0.12) | -0.60                     | P<0.001      |
| Muscle depth (mm)         | 54.89 (1.05)                   | 49.49 (1.02) | 5.40 (0.63)  | 5.54 (0.24) | 0.97                      | P<0.001      |
| <i>Periods:</i>           |                                |              |              |             |                           |              |
| To 40kg (d)               | 91.66 (2.12)                   | 88.62 (2.11) | 3.04 (1.01)  | 9.01 (0.45) | 0.36                      | P<0.01       |
| From 40 to 100kg (d)      | 66.33 (1.67)                   | 66.62 (1.67) | -0.29 (1.81) | 6.75 (0.36) | -0.04                     | NS           |

461

462

463

464 **FIGURES**

465 **Fig 1**

466 **A:** Homozygosity mapping of the leg weakness syndrome assuming a single underlying  
467 recessive mutation on Chromosome 15 (SSC15). Vertical blocks in red and yellow  
468 represent homozygous genotypes, and blue the heterozygote genotype. The ten cases  
469 (above) and ten controls (below) are shown (one per line). A summary of homozygosity  
470 mapping is provided cases vs control at the bottom of Fig1A in which if all the animals  
471 within a group (i.e. case or control) are homozygous for the same allele, then the relevant  
472 colour (red or yellow) is shown and if any animal within a group (i.e. case or control) is  
473 heterozygous then the SNP is coloured blue

474 **B:** This is an extract from Fig1a, showing the longest shared haplotype segment (55 SNPs)  
475 in the cases on SSC15 ranging from ALGA0110636 (rs81338938) to H3GA0044732  
476 (rs80936849) and corresponds to position 86,745,668– 95,062,143 in the new pig  
477 reference genome assembly Sscrofa11.1 GCA\_000003025.6). The first ten lines are the  
478 cases; the second ten lines are the controls with genotypes shown only for the region of  
479 homozygosity shared across the controls. Genotypes shown for controls are shown only  
480 if they are different to cases (blank genotype in controls within the targeted segment  
481 means that they share the same genotype as cases). Finally, the bottom two lines are  
482 summary lines shown on the same basis as the summary lines in Fig1A.

483 **Fig 2**

484 (A) Position of the premature stop causing mutation within the porcine myostatin locus;

485 (B) Conservation of the amino acid sequence surrounding the mutation, with the

486 consequences of the premature stop mutation highlighted in red.

1 **FIGURES**

2 **1 A:**

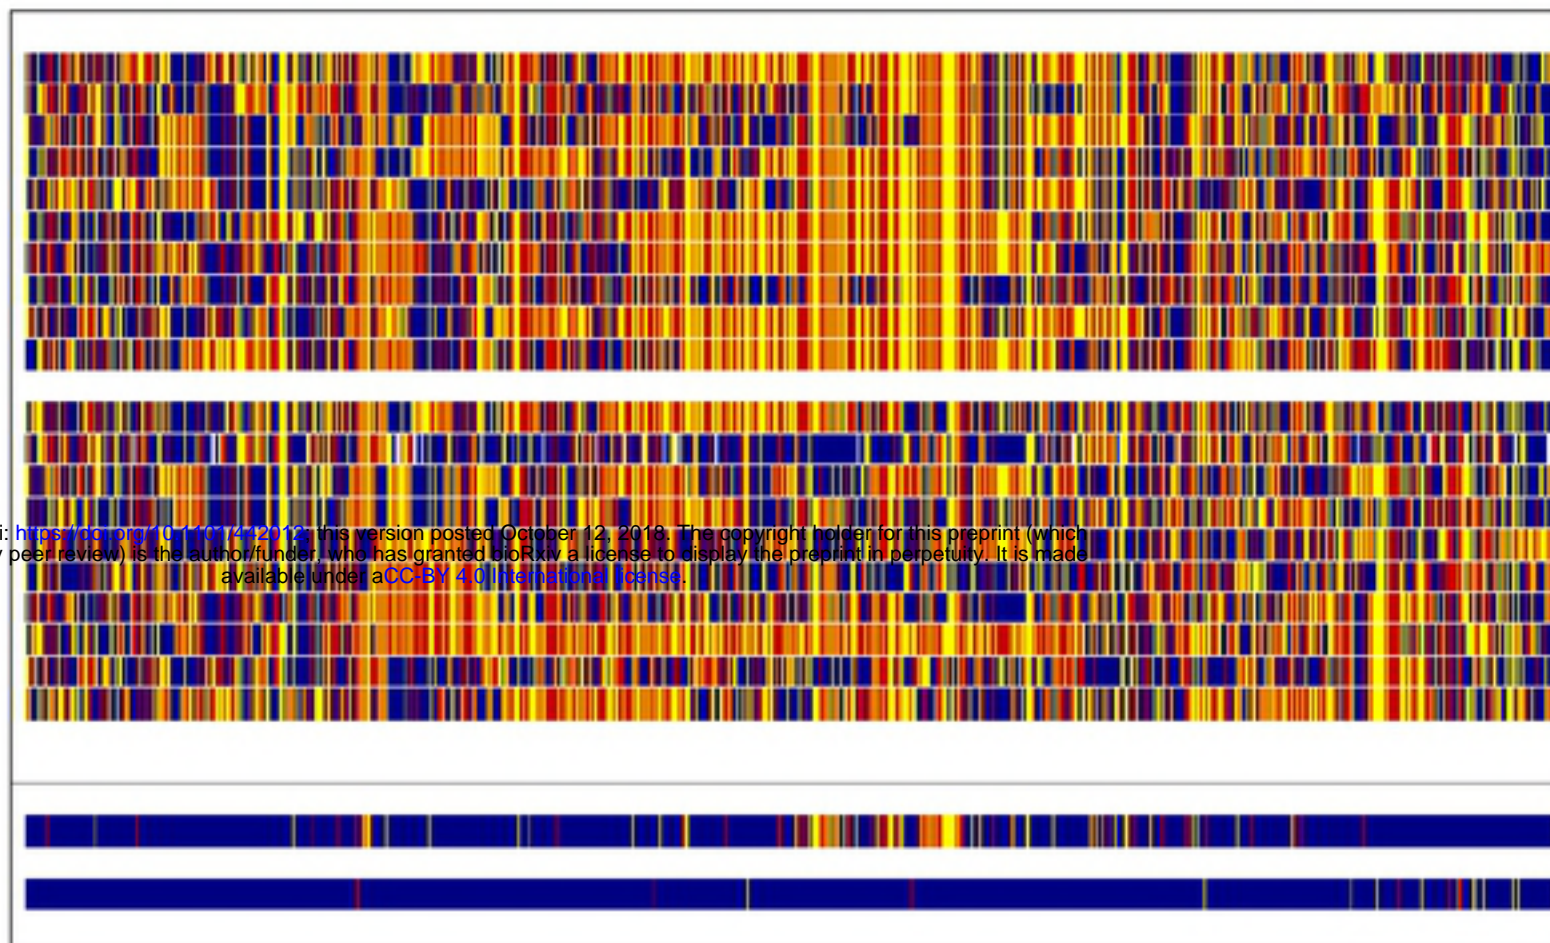

bioRxiv preprint doi: <https://doi.org/10.1101/102110>; this version posted October 12, 2016. The copyright holder for this preprint (which was not certified by peer review) is the author/funder, who has granted bioRxiv a license to display the preprint in perpetuity. It is made available under aCC-BY 4.0 International license.

3

4 **1 B:**

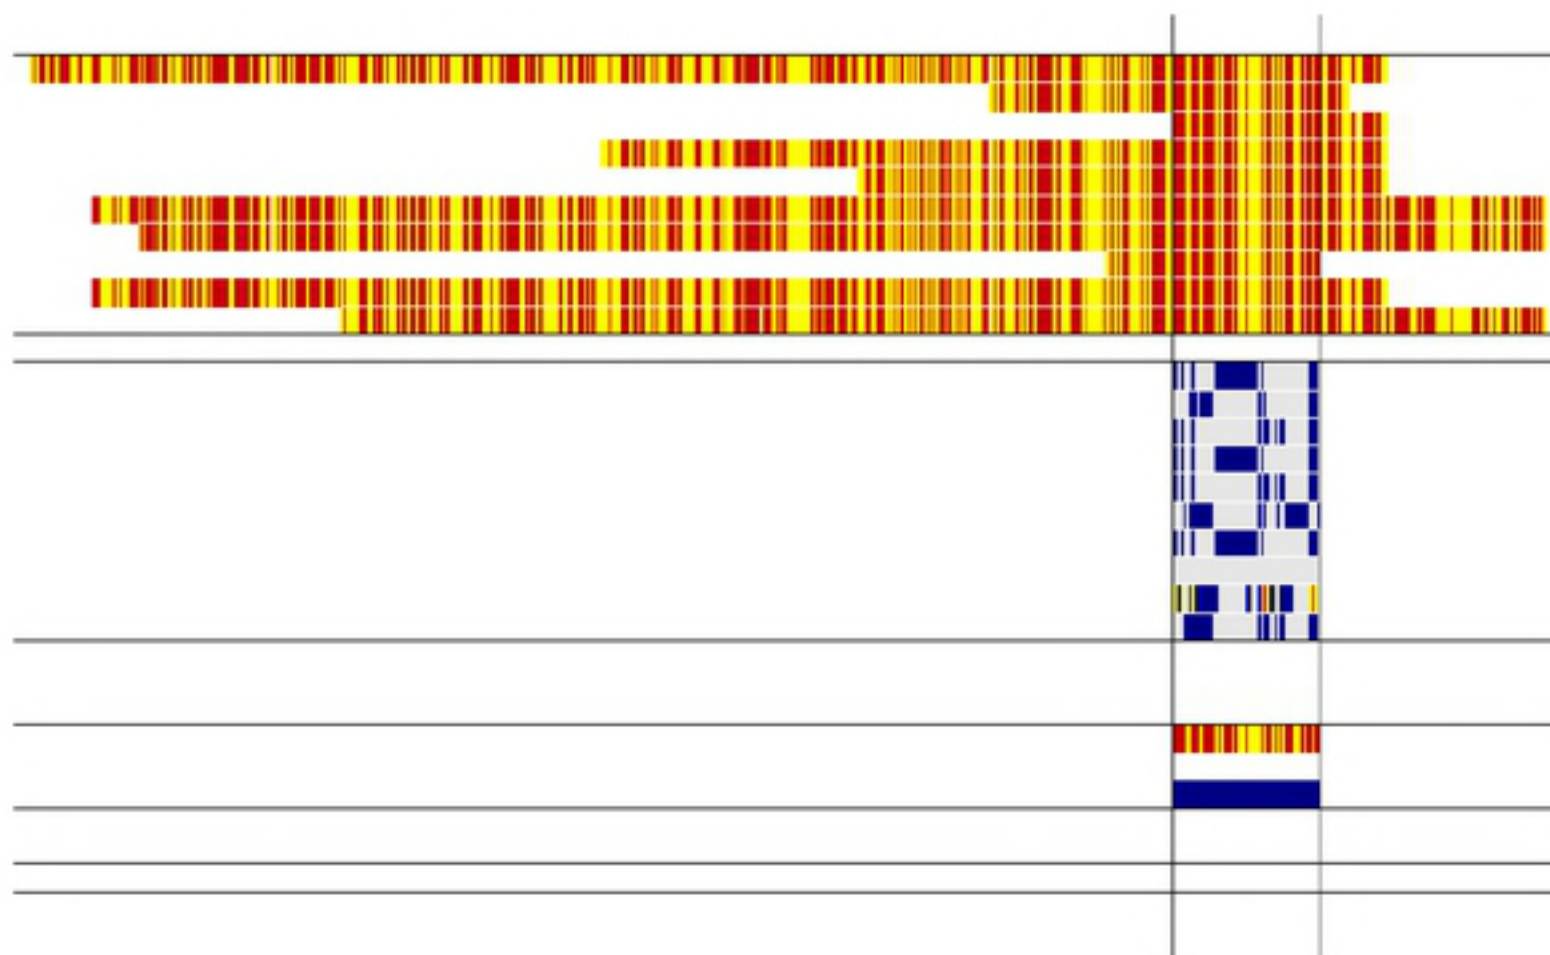

5

1 FIGURES

2 2 A:

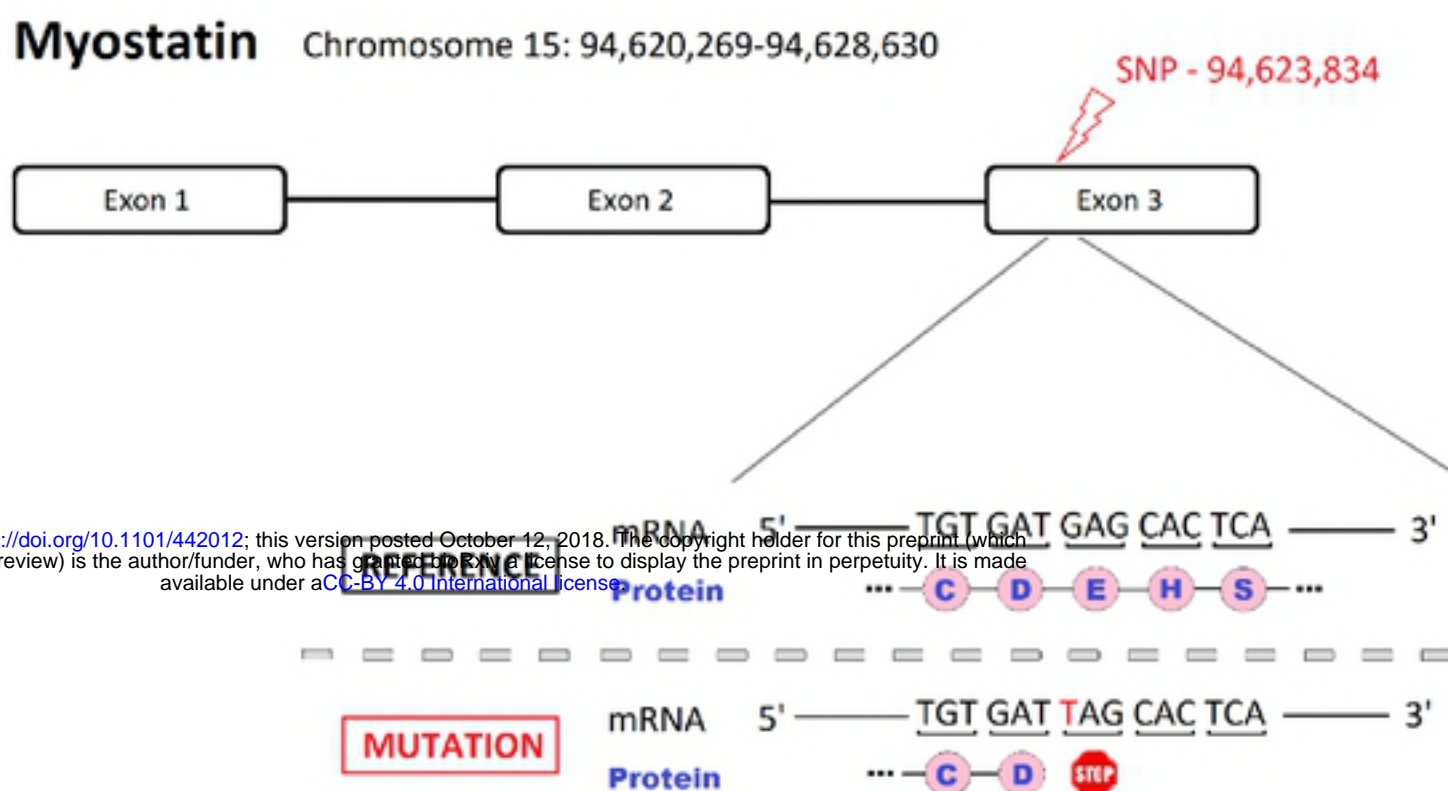

bioRxiv preprint doi: <https://doi.org/10.1101/442012>; this version posted October 12, 2018. The copyright holder for this preprint (which was not certified by peer review) is the author/funder, who has granted bioRxiv a license to display the preprint in perpetuity. It is made available under aCC-BY 4.0 International license.

3

4 2 B:

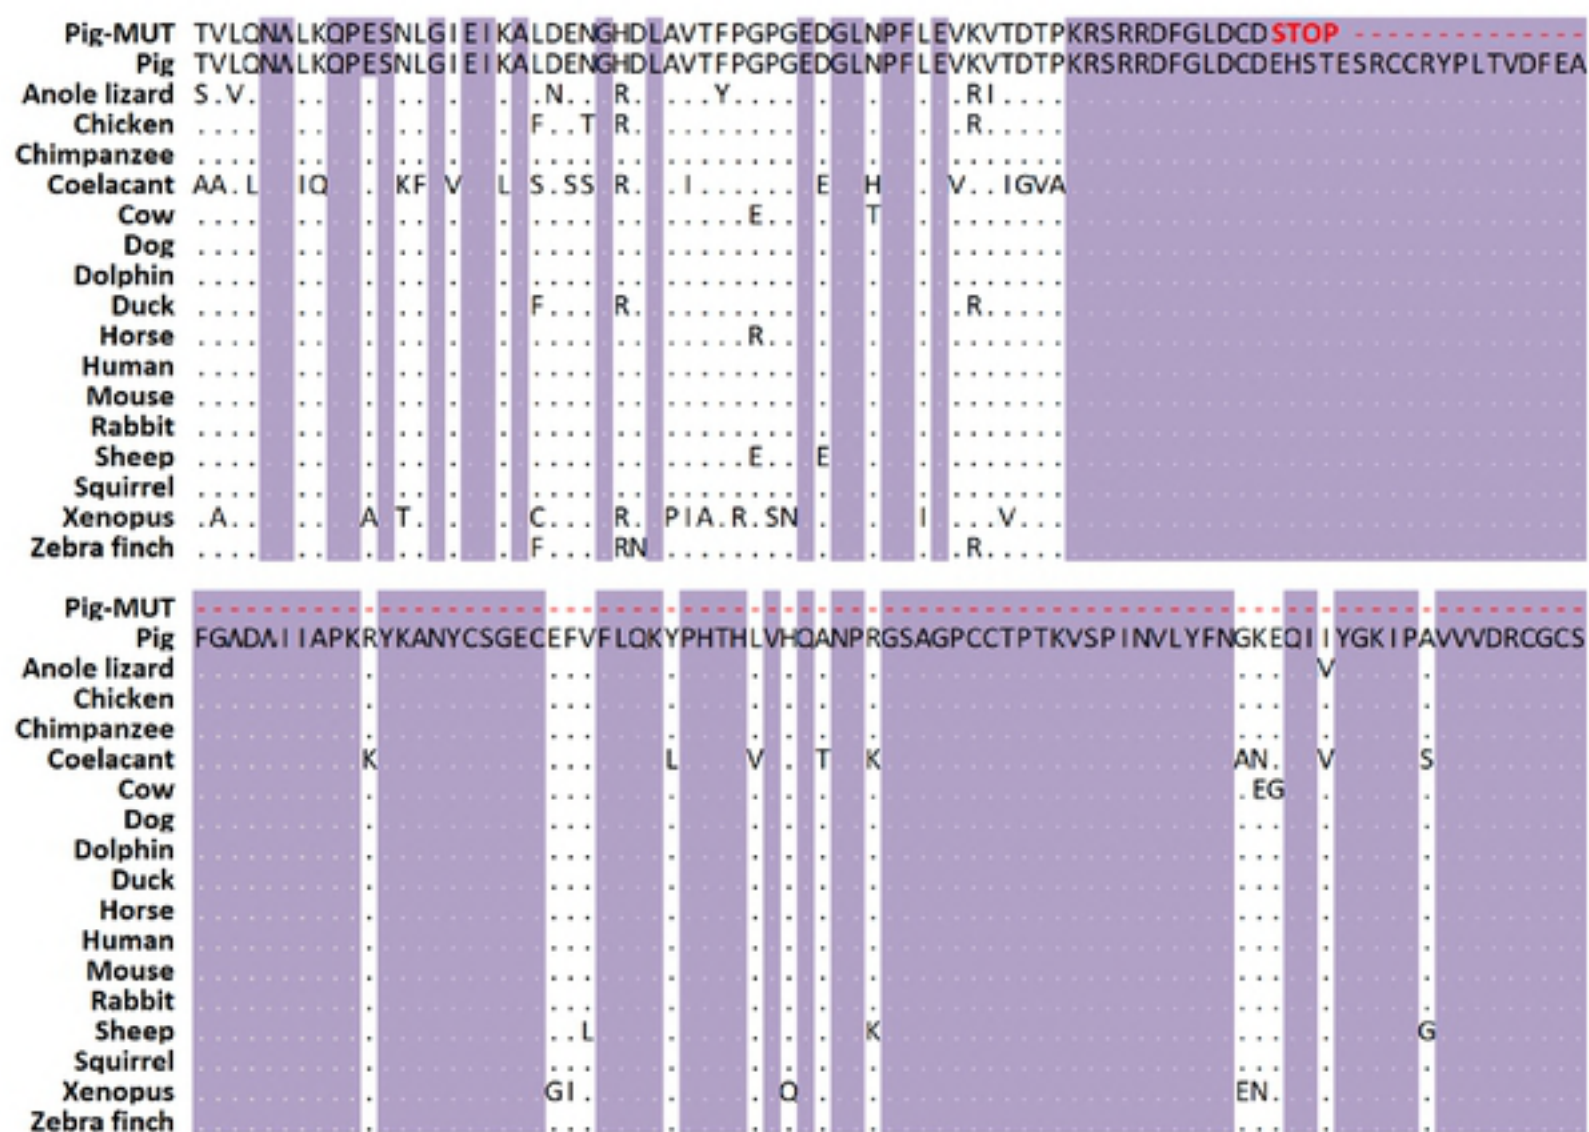

5

Figure 2
